# Supplementary material for: Profile
Source: Royal Society of Chemistry journal article supplement (doi:10.1039/b303931p), 2003-01-01
Supplement: b303931p.doc [file b303931p.doc]

**SUPPLEMENTARY QUESTIONS**

- *What is your educational background?*
- Physical Chemistry and Solid State Physics. Study of solid/wet and solid/gas interfaces.
- *How did you get into this field of miniaturisation?*
- Via liquid junction solar cells and chemical sensors. I was one of the first to apply miniaturization (MEMS) to chemical and biological sensors (before BIOMEMS was coined I wrote a book on Chemical Sensing with Solid State Devices, Academic Press, 1989)
- *Talk us through some of the most significant/valuable (to the community) research you have done in the past.*
- That would be in the area of *in vivo* and *in vitro* diagnostics and responsive drug delivery.
- *What is your current area of research?*
- Novel, beyond lithography techniques to write patterns, active DNA arrays, polymer actuators, C-MEMS and CD fluidics
- *Why is it important? How will it benefit the field/community?*
- It is all at the interface of organic/inorganic where I expect most progress to be made in biotechnology over the next ten years. Through biomimetics we might acquire less harmful, more versatile manufacturing techniques.
- *If you had all the money you required, what other projects/research would you be involved in?*
- Connecting functional biomolecules to nanomachined structures to exploit the best of both worlds.
- *What is the most important aspect/value of micro/nano technology?*
- The discovery of nature’s ways of building things.
- *Does this field have a future and why?*
- It has a very bright future. It is so fundamental that many new disciplines will emerge from it.
- *What future directions a) will your research take and b) do you envisage for your research?*
- I will get more and more involved with single molecule devices.
- *What funding problems do you have?*
- Just started back in academia and need to break into the funding agencies. The way funds are doled out seems very subjective ( I have seen people review million dollar proposals in 5 minutes or less) and has a lot to do with the PR machine of the different Universities and Institutes.
- *As an academic, do you have sufficient time for research?*
- Yes.
- *What is the situation with students; is it becoming easier or more difficult to find doctoral and post docs with relevant backgrounds?*
- With the current economic crisis it has become quite easy. We have post-docs now that want to work for free !!
- *What is the situation with recruiting students to chem/bio/phys/electronics at your institution?*
- Very positive.
- *What are the major bottlenecks in miniaturisation at present?*
- Making connections to nano devices and making precise nano particles (e.g. all 123 nanometre long C-nanotubes)
- *Which are the main journals you contribute miniaturisation research to and why?*

*Sensors and Actuators B* as I am the Editor for North and South America.

- *What are the major problems for miniaturisation at the moment?*
- Needs much more fundamental work before we rush into exaggerated predictions.
- *There are now several conferences that deal specifically with miniaturisation issues, where a lot of work is presented, but not much finds its way into refereed mainstream journals. Why do you think this is? Is the same work being touted everywhere?*
- Yes, there is a lot of repetition and there are very few new relevant results as it is so difficult a field. Commercial interests have pushed for results too fast. There is a lot of very fundamental work that needs to be carried out.
- *What do you think of the* Lab on a Chip *journal?*
- Good, practical Journal.
